# Supplementary material for: An entirely automated method to score DSS-induced colitis in mice by digital image analysis of pathology slides
Source: PubMed Central journal article supplement — Dis Model Mech. 2013 Apr 10;6(3):855–65. doi: 10.1242/dmm.011759 (PMC3634668; doi:10.1242/dmm.011759), 2013-04-10
Supplement: supp_011759_DMM011759.pdf [file supp_011759_DMM011759.pdf]

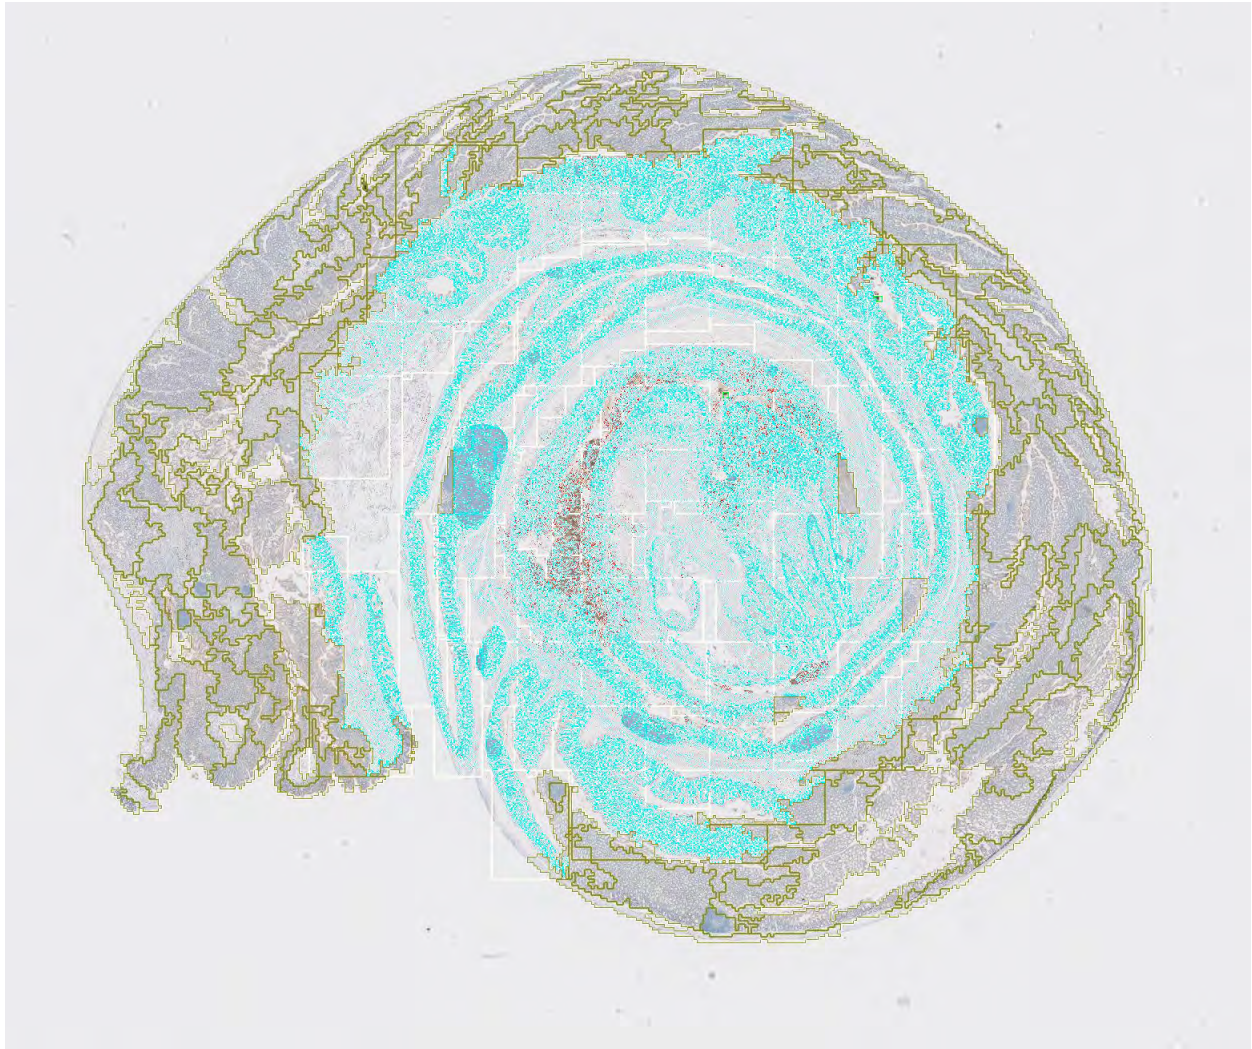

**Fig. S1. Automated image analysis result of a slide stained with MPO, a neutrophil marker.** The tissue is a “Swiss Roll” preparation of the large intestines, from a mouse after administration of DSS. Areas where staining was detected are outlined in red, areas of tissue without stain in blue, and the proximal colon (not analyzed) in green.

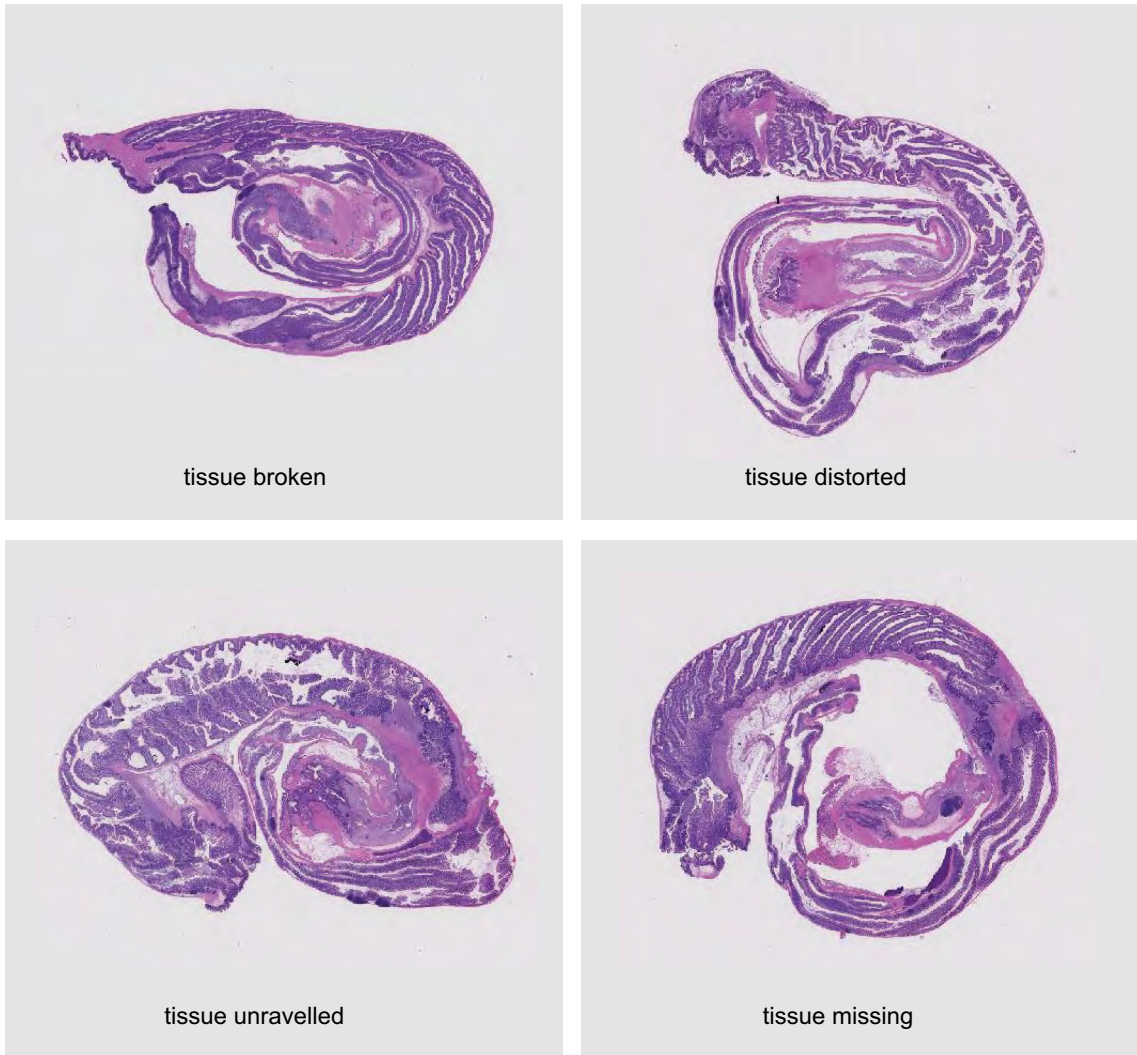

**Fig. S2. Examples of poorly prepared colitis slides that may affect automated H&E morphology analysis.** Scanned images of slides that had broken, distorted, unraveled, or missing tissue are shown.



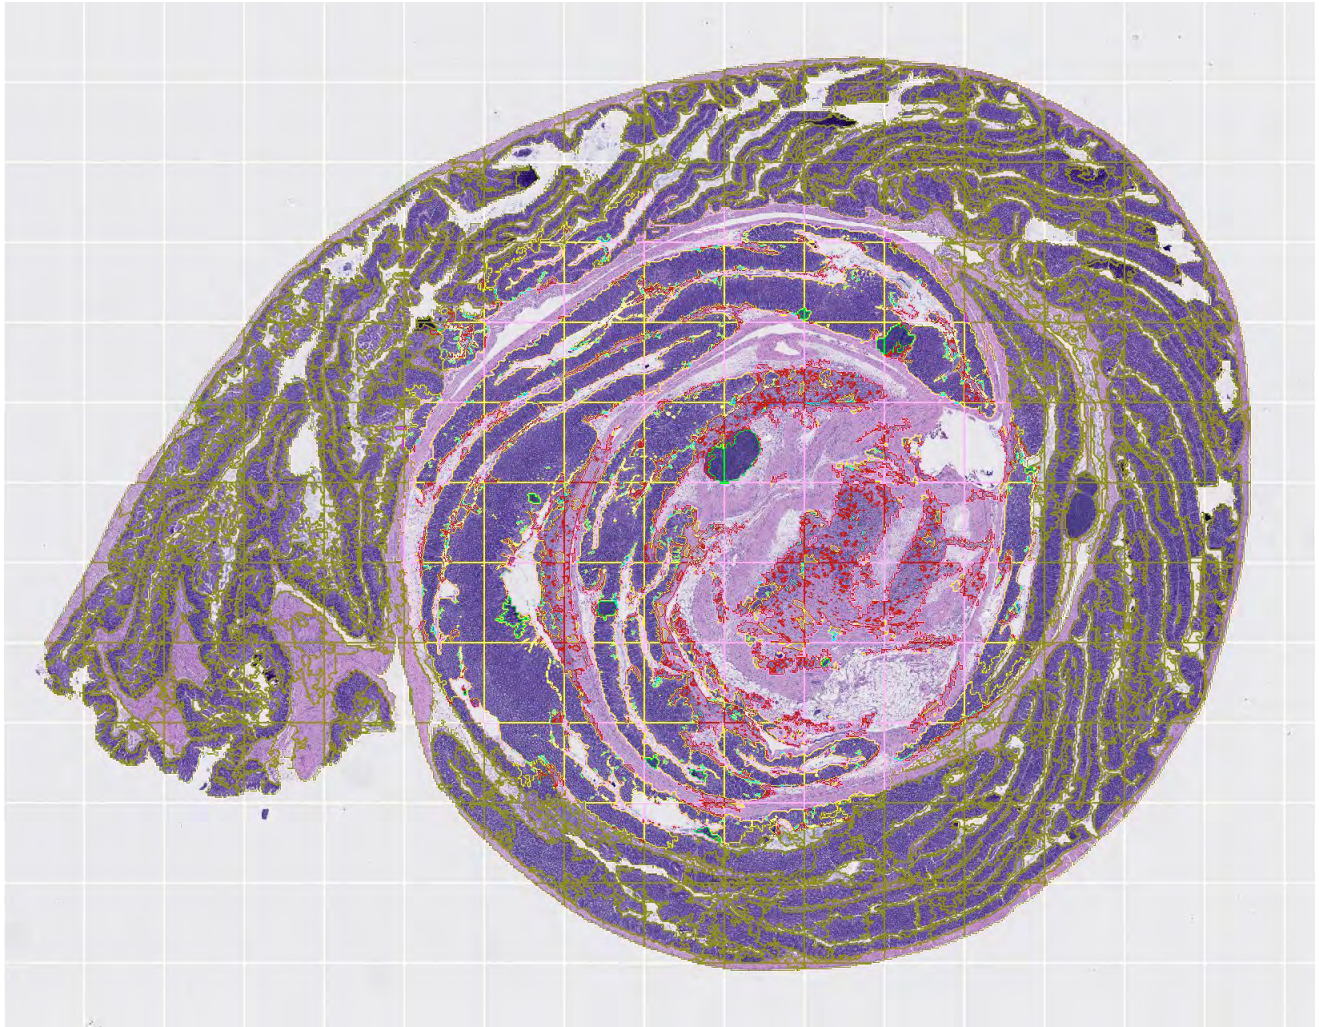

**Fig. S3. Automated image analysis result of an H&E slide image of a “Swiss Roll” preparation of mouse intestines, from an animal after administration of DSS.** Automatically detected areas of pathology are outlined in red, areas with healthy tissue in yellow, lymph nodes in green, and the proximal colon (not analyzed) in brown.

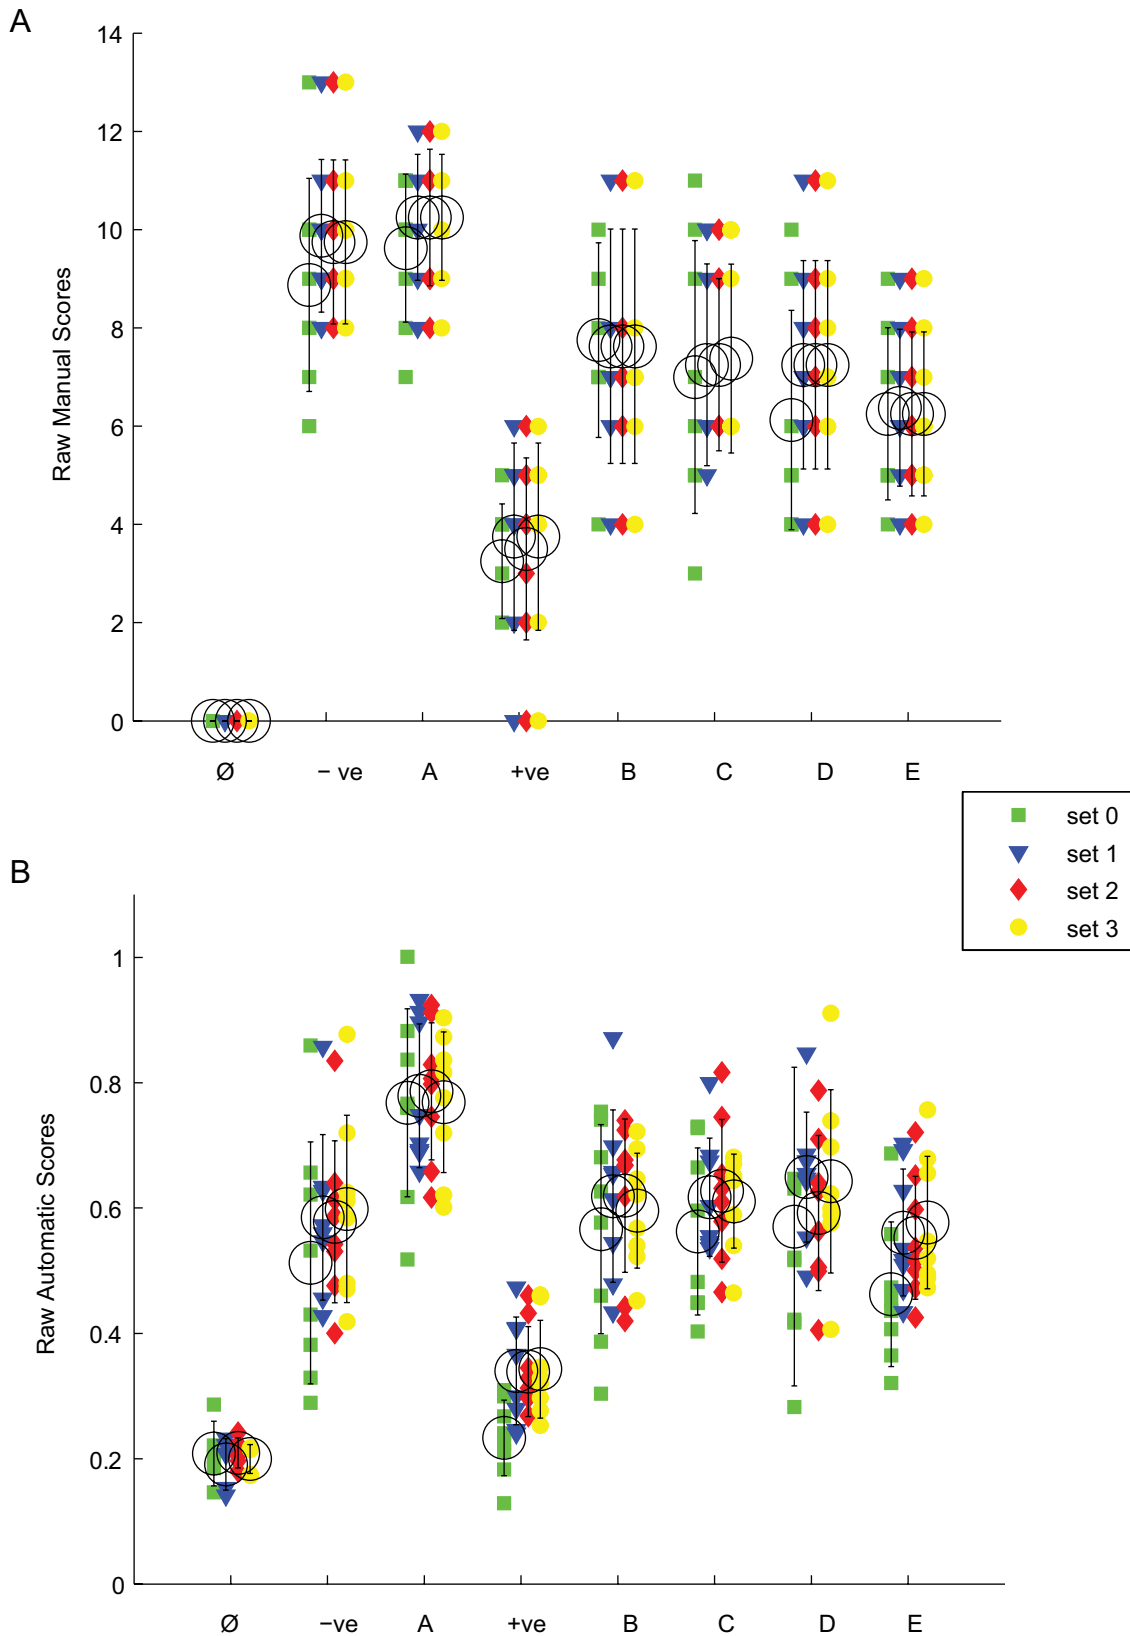

**Fig. S4. The scores obtained for manual (A) and automated (B) reads for 4 serial sections of study #1 are plotted.** Each marker indicates a single animal, and is color-coded by the serial section set from which it was obtained. The markers are plotted for every animal in each experimental test group, where  $\emptyset$  corresponds to the  $\emptyset$  control group (no DSS), -ve corresponds to DSS, and +ve corresponds to DSS and IL-22 Fc, and the letters A to E correspond to DSS and various compounds. Means are indicated by small circles, and error bars correspond to 1 s.d.
